# Supplementary material for: Integration of Traditional and Metabolomics Biomarkers Identifies Prognostic Metabolites for Predicting Responsiveness to Nutritional Intervention against Oxidative Stress and Inflammation
Source: PubMed Central journal article supplement (PMC5372896; doi:10.3390/nu9030233), 2017-03-04
Supplement: nutrients-09-00233-s001.pdf [file nutrients-09-00233-s001.pdf]

# Supplementary Materials: Integration of Traditional and Metabolomics Biomarkers Identifies Prognostic Metabolites for Predicting Responsiveness to Nutritional Intervention against Oxidative Stress and Inflammation

You Jin Kim, Iksoo Huh, Ji Yeon Kim, Saejong Park, Sung Ha Ryu, Kyu-Bong Kim, Suhkmann Kim, Taesung Park, and Oran Kwon

## 3. Results

### 3.1. Preliminary Study to Compare Oxidative Stress and Inflammation in the KBR and NAB Groups Using Traditional Biomarkers

A total of 72 subjects were enrolled and 67 subjects were evaluable for response in a preliminary study (Supplemental Figure S1). All the participants were documented to fit the protocol and the groups were well matched for age and sex (Supplemental Table S1). From the three-day dietary records completed during the intervention, no significant group effect was detected across the baseline and four-week intervention among the dietary intake variables in terms of calories or micronutrients (Supplemental Table S2). The overall compliance was estimated at 96%. No serious or severe adverse events were.

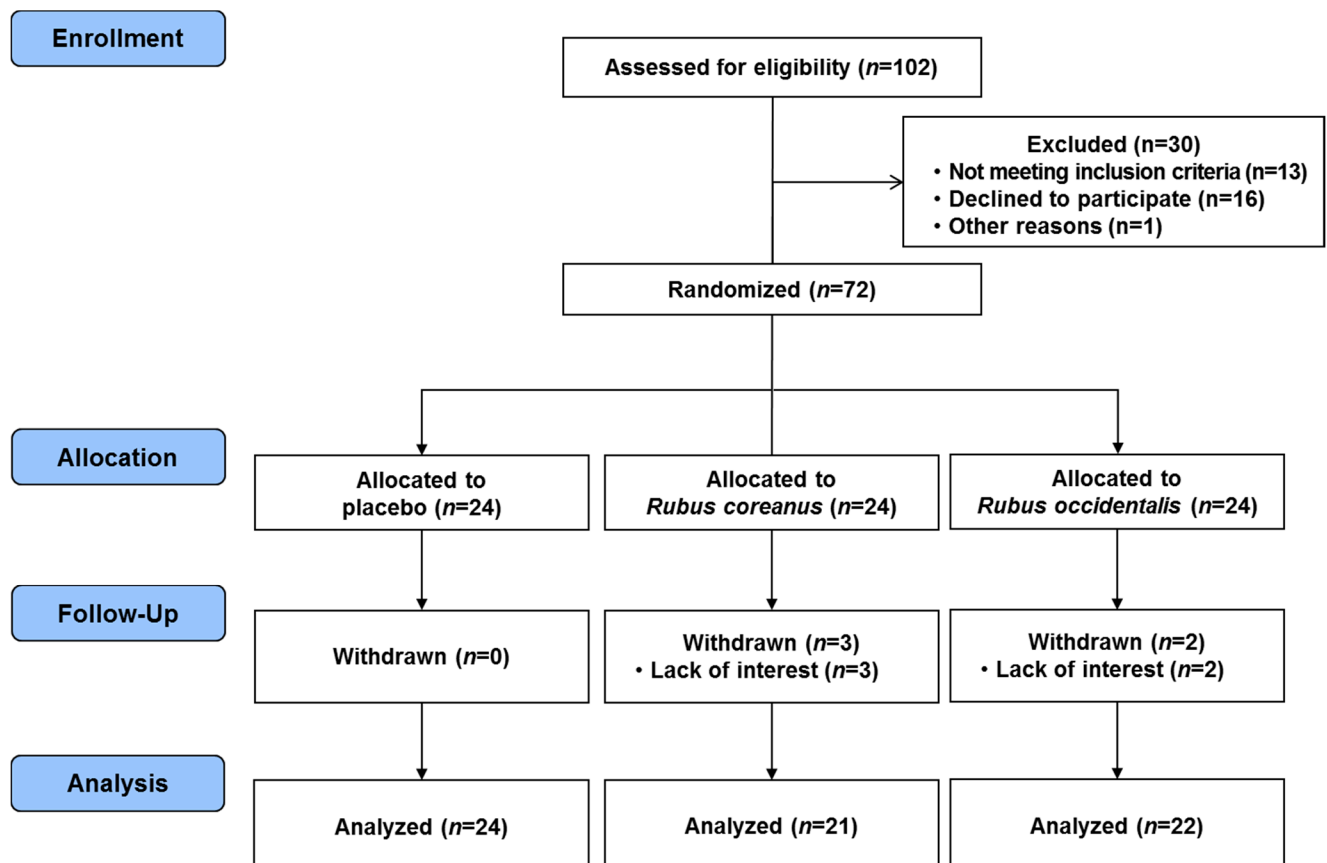

**Figure S1.** The Consolidated Standards of Reporting Trials flow diagram representing the phases of the randomized study for comparing the two species of raspberries.

**Table S1.** Baseline characteristics of subjects participated in a preliminary study <sup>1</sup>.

| <b>Variables</b>                              | <b>Placebo (<i>n</i> = 24)</b> | <b>NAB (<i>n</i> = 22)</b> | <b>KBR (<i>n</i> = 21)</b> |
|-----------------------------------------------|--------------------------------|----------------------------|----------------------------|
| Age (y)                                       | 45 ± 8                         | 42 ± 8                     | 46 ± 7                     |
| Female/male ( <i>n</i> )                      | 13/11                          | 13/9                       | 10/11                      |
| BMI (kg/m <sup>2</sup> )                      | 25 ± 2                         | 25 ± 2                     | 25 ± 2                     |
| Body fat (%)                                  | 28 ± 8                         | 27 ± 8                     | 27 ± 8                     |
| WHR                                           | 0.87 ± 0.05                    | 0.88 ± 0.06                | 0.87 ± 0.04                |
| Blood pressure (mmHg)                         |                                |                            |                            |
| Systolic                                      | 130 ± 14                       | 128 ± 8                    | 129 ± 16                   |
| Diastolic                                     | 86 ± 12                        | 86 ± 10                    | 86 ± 23                    |
| FBG (mmol/L)                                  | 5.50 ± 0.61                    | 5.44 ± 0.44                | 5.74 ± 1.00                |
| Hb (g/L)                                      | 14 ± 1                         | 15 ± 1                     | 14 ± 2                     |
| Hct (%)                                       | 43 ± 3                         | 44 ± 3                     | 42 ± 4                     |
| VO <sub>2max</sub> (mL/kg/min)                | 34 ± 6                         | 35 ± 6                     | 35 ± 7                     |
| HR <sub>max</sub> (beat/min)                  | 175 ± 13                       | 178 ± 14                   | 174 ± 12                   |
| BMR (kcal/day)                                | 1574 ± 209                     | 1608 ± 190                 | 1550 ± 212                 |
| TEE (kcal/day)                                | 2567 ± 403                     | 2585 ± 393                 | 2453 ± 467                 |
| Drinker/non-drinker ( <i>n</i> ) <sup>2</sup> | 9/15                           | 8/14                       | 8/13                       |

BMI: body mass index; BMR: basal metabolic rate; FBG: fasting blood glucose; Hb: hemoglobin; Hct: hematocrit; HR<sub>max</sub>: maximum heart rate; KBR: Korean black raspberry; NAB: North American black raspberry; TEE: total energy expenditure; VO<sub>2max</sub>: maximum oxygen consumption; WHR: waist-to-hip ratio. 1 Data are expressed as the means ± SD for continuous variables or frequencies for categorical variables. 2 Drinkers were defined as participants who consumed one or more alcoholic drinks per month.

**Table S2.** Daily dietary energy and nutrient intake at baseline and Week 4 <sup>1</sup>.

| Variables          | Placebo ( <i>n</i> = 24) |            | NAB ( <i>n</i> = 22) |             | KBR ( <i>n</i> = 21) |            | <i>p</i> -value <sup>2</sup> |       |       |
|--------------------|--------------------------|------------|----------------------|-------------|----------------------|------------|------------------------------|-------|-------|
|                    | Baseline                 | Week 4     | Baseline             | Week 4      | Baseline             | Week 4     | G                            | T     | G*T   |
| Energy (kcal)      | 1789 ± 438               | 1817 ± 372 | 1705 ± 656           | 1867 ± 653  | 1786 ± 407           | 1802 ± 436 | 0.783                        | 0.149 | 0.402 |
| Macronutrients (g) |                          |            |                      |             |                      |            |                              |       |       |
| Carbohydrate       | 257 ± 66                 | 258 ± 47   | 242 ± 65             | 258 ± 69    | 264 ± 56             | 252 ± 71   | 0.745                        | 0.685 | 0.255 |
| Protein            | 75 ± 35                  | 72 ± 19    | 71 ± 34              | 74 ± 27     | 68 ± 17              | 73 ± 17    | 0.838                        | 0.290 | 0.637 |
| Fat                | 50 ± 16                  | 51 ± 17    | 51 ± 31              | 58 ± 33     | 50 ± 16              | 52 ± 118   | 0.954                        | 0.227 | 0.591 |
| Minerals (mg)      |                          |            |                      |             |                      |            |                              |       |       |
| Calcium            | 529 ± 34                 | 496 ± 44   | 504 ± 248            | 474 ± 174   | 558 ± 50             | 509 ± 49   | 0.593                        | 0.201 | 0.580 |
| Zinc               | 9.3 ± 1.0                | 9.0 ± 1.2  | 8 ± 3                | 8 ± 3       | 8.2 ± 0.5            | 8.5 ± 0.4  | 0.603                        | 0.557 | 0.371 |
| Iron               | 14 ± 1                   | 12 ± 1     | 12 ± 5               | 12 ± 4      | 14 ± 1               | 13 ± 1     | 0.413                        | 0.254 | 0.424 |
| Vitamins           |                          |            |                      |             |                      |            |                              |       |       |
| Vitamin A (µg RE)  | 562 ± 45                 | 640 ± 51   | 609 ± 288            | 587 ± 322   | 558 ± 40             | 621 ± 48   | 0.843                        | 0.247 | 0.427 |
| Retinol (µg)       | 111 ± 15                 | 145 ± 24   | 94 ± 58              | 136 ± 120   | 120 ± 14             | 146 ± 29   | 0.540                        | 0.081 | 0.723 |
| β-Carotene (mg)    | 2.1 ± 0.2                | 2.5 ± 0.2  | 2621 ± 1494          | 2253 ± 1158 | 2.3 ± 0.2            | 2.5 ± 0.2  | 0.910                        | 0.709 | 0.210 |
| Vitamin E (mg)     | 12 ± 1                   | 14 ± 1     | 12 ± 6               | 15 ± 10     | 13 ± 1               | 13 ± 1     | 0.824                        | 0.045 | 0.324 |
| Vitamin C (mg)     | 87 ± 11                  | 72 ± 7     | 90 ± 66              | 63 ± 29     | 93 ± 13              | 89 ± 10    | 0.254                        | 0.067 | 0.393 |
| Folate (µg)        | 195 ± 15                 | 211 ± 18   | 200 ± 84             | 194 ± 70    | 197 ± 12             | 214 ± 15   | 0.721                        | 0.304 | 0.755 |

KBR: Korean black raspberry; and NAB: North American black raspberry. <sup>1</sup> All values are shown as the means ± SD. Intake levels were estimated from three-day food records using CAN-pro (Korean Nutrition Society, Seoul, Korea). The intake of the test material was not included in the analysis.

<sup>2</sup> Repeated-measures ANOVA was used to compare the changes in nutritional intake over time (baseline and Week 4) between the three groups (placebo, NAB, and KBR). G, T, G\*T represents main effects for group, time, and group X time interaction.

The MDA, oxidized LDL, TNF- $\alpha$ , and IL-6 were measured in plasma. However, endogenous antioxidants and enzymes including GSH, GSSG, GPx, SOD, and CAT were measured in erythrocytes, because they are abundant in erythrocytes, which are constantly subjected to oxidative stress. The data demonstrated that the overall effect was similar for both KBR and NAB, but KBR showed a more significant effect than NAB in terms of GSSG ( $q = 0.036$ ), GSH:GSSG ( $q = 0.050$ ), and MDA ( $q = 0.008$ ) levels (Supplemental Table S3).

**Table S3.** Comparison of anti-oxidant and anti-inflammatory effects of KBR and NAB in sedentary overweight/obese adults challenged with exercise <sup>1</sup>.

| Variables                | Placebo ( $n = 24$ ) |                           | NAB ( $n = 22$ ) |                 | KBR ( $n = 21$ ) |                  | Overall<br>$q$ -value <sup>3</sup> | PLA vs. NAB          |            | PLA vs. KBR |            | NAB vs. KBR |            |
|--------------------------|----------------------|---------------------------|------------------|-----------------|------------------|------------------|------------------------------------|----------------------|------------|-------------|------------|-------------|------------|
|                          | Baseline             | Delta change <sup>2</sup> | Baseline         | Delta change    | Baseline         | Delta change     |                                    | $\beta$ <sup>4</sup> | $q$ -value | $\beta$     | $q$ -value | $\beta$     | $q$ -value |
| GSH ( $\mu$ M/g Hb)      | 34.0 $\pm$ 1.2       | 2.6 $\pm$ 0.7             | 35.2 $\pm$ 1.3   | 1.4 $\pm$ 0.6   | 33.7 $\pm$ 1.3   | 2.5 $\pm$ 1.0    | 0.333                              | -0.765               | 0.427      | 0.714       | 0.464      | 1.479       | 0.605      |
| GSSG ( $\mu$ M/g Hb)     | 12.9 $\pm$ 0.6       | 1.8 $\pm$ 0.3             | 13.4 $\pm$ 0.6   | 0.7 $\pm$ 0.3   | 12.9 $\pm$ 0.7   | 0.3 $\pm$ 0.4    | 0.045                              | -1.023               | 0.049      | -1.117      | 0.027      | -0.095      | 0.036      |
| GSH:GSSG ratio           | 3.0 $\pm$ 0.2        | -0.3 $\pm$ 0.1            | 2.8 $\pm$ 0.2    | -0.3 $\pm$ 0.2  | 2.8 $\pm$ 0.2    | 0.2 $\pm$ 0.2    | 0.116                              | 0.025                | 0.250      | 0.045       | 0.039      | 0.021       | 0.050      |
| GPx (nmol/min/g Hb)      | 60.8 $\pm$ 3.3       | 2.2 $\pm$ 1.2             | 60.9 $\pm$ 3.4   | -0.7 $\pm$ 1.1  | 61.8 $\pm$ 3.5   | 4.1 $\pm$ 1.7    | 0.264                              | -0.017               | 0.332      | 0.012       | 0.480      | 0.029       | 0.465      |
| SOD (U/g Hb)             | 21.8 $\pm$ 0.8       | -0.4 $\pm$ 0.7            | 21.0 $\pm$ 0.8   | -1.1 $\pm$ 1.0  | 21.8 $\pm$ 0.9   | -0.3 $\pm$ 0.7   | 0.803                              | -0.011               | 0.611      | 0.003       | 0.897      | 0.014       | 0.803      |
| Catalase (nmol/min/g Hb) | 133.1 $\pm$ 5.4      | -7.7 $\pm$ 3.9            | 129.8 $\pm$ 5.6  | -12.2 $\pm$ 3.9 | 126.8 $\pm$ 5.8  | -8.6 $\pm$ 5.3   | 0.284                              | -4.025               | 0.433      | 4.432       | 0.394      | 8.457       | 0.626      |
| MDA (nM)                 | 14.5 $\pm$ 1.5       | 0.0 $\pm$ 0.4             | 15.3 $\pm$ 1.6   | -1.5 $\pm$ 0.4  | 16.4 $\pm$ 1.6   | -2.5 $\pm$ 0.6   | 0.019                              | -0.037               | 0.067      | -0.058      | 0.006      | -0.020      | 0.008      |
| Oxidized LDL (U/L)       | 46.0 $\pm$ 4.0       | -0.8 $\pm$ 1.7            | 47.2 $\pm$ 4.2   | -2.8 $\pm$ 1.3  | 46.8 $\pm$ 4.3   | -5.3 $\pm$ 1.4   | 0.051                              | 0.012                | 0.612      | -0.044      | 0.060      | -0.056      | 0.070      |
| IL-6 (pg/mL)             | 196.1 $\pm$ 22.8     | 51.4 $\pm$ 31.8           | 177.0 $\pm$ 23.8 | 21.9 $\pm$ 17.1 | 182.7 $\pm$ 24.4 | -52.1 $\pm$ 17.9 | 0.014                              | -0.056               | 0.407      | -0.199      | 0.006      | -0.143      | 0.185      |
| TNF- $\alpha$ (pg/mL)    | 5.5 $\pm$ 0.5        | 0.6 $\pm$ 0.4             | 5.4 $\pm$ 0.5    | 0.7 $\pm$ 0.4   | 5.9 $\pm$ 0.5    | 0.1 $\pm$ 0.4    | 0.517                              | 0.407                | 0.852      | -0.547      | 0.279      | -0.954      | 0.628      |

GSH, reduced glutathione; GSSG, oxidized glutathione; GPx, glutathione peroxidase; Hb, hemoglobin; SOD, superoxide dismutase; MDA, malondialdehyde; IL-6, interleukin-6; TNF- $\alpha$ , tumor necrosis factor-alpha. <sup>1</sup> Data are expressed as the means  $\pm$  SEM. <sup>2</sup> The delta change was calculated by subtracting the measurement at baseline from that at the end of four weeks. <sup>3</sup> The  $q$ -values were calculated from  $p$ -values using Storey's false discovery rate approach. <sup>4</sup> The beta estimates ( $\beta$ ; estimated slope) of each variable were determined using a linear mixed-effects model.

### 3.2. Selection of Traditional Biomarkers and Metabolites for Integration

The <sup>1</sup>H-NMR metabolomics data were obtained from the KBR group: 63 metabolites were identified in the urine samples (Supplemental Table S4) and the 31 metabolites were identified in the plasma samples (Supplemental Table S5). A LME model was used to assess differences in the KBR and the control group. As a result, four traditional biomarkers and sixteen urinary metabolites with FDR *q*-values less than 0.05 were selected to be included in further analysis (Table 1). Four traditional biomarkers were GSSG (*q* = 0.027) and GSH:GSSG ratio (*q* = 0.039) in erythrocytes and MDA (*q* = 0.006) and IL-6 (*q* = 0.006) in plasma; and sixteen metabolites were amino acids (alanine, asparagine, glutamine, glycine, histidine, lysine, serine, and carnitine), organic acids (citrate and formate), purine nucleotide (adenine), and other metabolites (N6-acetylllysine, betaine, 3-indoxylsulfate, N-phenylacetyl glycine (PAG), and phenylacetate).

**Table S4.** Summary of urinary <sup>1</sup>H NMR metabolites before and after placebo or KBR administration in sedentary overweight/obese adults challenged with exercise <sup>1</sup>.

| Variables (M)                 | Placebo (n = 24) |                           | KBR (n = 21) |              | $\beta^3$ | <i>q</i> -value <sup>4</sup> |
|-------------------------------|------------------|---------------------------|--------------|--------------|-----------|------------------------------|
|                               | Baseline         | Delta change <sup>2</sup> | Baseline     | Delta change |           |                              |
| 1-Methylnicotinamide          | 0.66 ± 0.06      | 0.09 ± 0.06               | 0.69 ± 0.05  | 0.02 ± 0.05  | -0.001    | 0.299                        |
| 2-Hydroxyisobutyrate          | 0.6 ± 0.03       | -0.03 ± 0.02              | 0.54 ± 0.03  | -0.05 ± 0.02 | -0.033    | 0.421                        |
| 3-Hydroxybutyrate             | 1.42 ± 0.1       | -0.04 ± 0.11              | 1.17 ± 0.09  | 0.19 ± 0.11  | 0.137     | 0.164                        |
| 3-Hydroxyisovalerate          | 0.65 ± 0.04      | 0.02 ± 0.03               | 0.55 ± 0.02  | 0.06 ± 0.03  | 0.028     | 0.590                        |
| 3-Indoxylsulfate              | 2.31 ± 0.16      | 0.11 ± 0.21               | 2.16 ± 0.18  | 0.81 ± 0.2   | 0.399     | 0.009                        |
| 3-Methyl-2-oxovalerate        | 0.91 ± 0.03      | 0.06 ± 0.04               | 0.81 ± 0.04  | 0.14 ± 0.05  | 0.001     | 0.206                        |
| 4-Aminobutyrate               | 1.28 ± 0.06      | 0.08 ± 0.08               | 1.28 ± 0.07  | 0.12 ± 0.08  | 0.050     | 0.491                        |
| Acetate                       | 0.62 ± 0.06      | -0.01 ± 0.08              | 0.7 ± 0.11   | -0.04 ± 0.09 | -0.025    | 0.834                        |
| Acetylsalicylate              | 0.34 ± 0.02      | 0.13 ± 0.05               | 0.42 ± 0.04  | 0.01 ± 0.05  | -0.148    | 0.287                        |
| Adenine                       | 1.26 ± 0.11      | 0.09 ± 0.18               | 1.64 ± 0.21  | -0.6 ± 0.2   | -0.286    | 0.041                        |
| Alanine                       | 2.79 ± 0.18      | -0.14 ± 0.17              | 2.49 ± 0.16  | 0.35 ± 0.13  | 0.194     | 0.021                        |
| Arginine                      | 2.83 ± 0.11      | 0.18 ± 0.14               | 2.45 ± 0.12  | 0.39 ± 0.16  | 0.002     | 0.258                        |
| Asparagine                    | 1.62 ± 0.09      | 0.16 ± 0.13               | 1.55 ± 0.09  | 0.47 ± 0.12  | 0.199     | 0.041                        |
| Aspartate                     | 2.59 ± 0.11      | 0.28 ± 0.14               | 2.32 ± 0.13  | 0.63 ± 0.14  | 0.003     | 0.084                        |
| Betaine                       | 1.63 ± 0.12      | -0.07 ± 0.13              | 1.55 ± 0.14  | 0.31 ± 0.15  | 0.295     | 0.024                        |
| Carnitine                     | 0.95 ± 0.11      | 0.22 ± 0.14               | 0.91 ± 0.09  | -0.13 ± 0.11 | -0.555    | 0.009                        |
| Choline                       | 0.56 ± 0.04      | 0.03 ± 0.04               | 0.5 ± 0.02   | 0.02 ± 0.03  | 0.000     | 0.904                        |
| Citrate                       | 11.49 ± 0.78     | -1.15 ± 0.5               | 11.19 ± 1.16 | 0.53 ± 0.68  | 0.029     | 0.037                        |
| Creatine                      | 4.43 ± 0.5       | -0.05 ± 0.52              | 4.07 ± 0.48  | 1 ± 0.88     | 0.108     | 0.405                        |
| Creatine phosphate            | 5.86 ± 0.36      | 1.07 ± 0.65               | 5.25 ± 0.45  | 1.7 ± 0.93   | 0.045     | 0.682                        |
| Dimethylamine                 | 4.85 ± 0.37      | 1.39 ± 0.89               | 5.03 ± 0.27  | 1.29 ± 0.8   | -0.005    | 0.956                        |
| Ethanol                       | 1.2 ± 0.07       | 0.08 ± 0.09               | 1.04 ± 0.08  | 0.19 ± 0.08  | 0.001     | 0.355                        |
| Ethanolamine                  | 5.83 ± 0.17      | 0.11 ± 0.19               | 5.79 ± 0.18  | 0.39 ± 0.26  | 0.003     | 0.344                        |
| Formate                       | 3.22 ± 0.28      | 0.01 ± 0.32               | 2.58 ± 0.19  | 1.31 ± 0.48  | 0.314     | 0.034                        |
| Fucose                        | 2.21 ± 0.12      | -0.04 ± 0.13              | 2.04 ± 0.08  | 0.22 ± 0.09  | 0.100     | 0.163                        |
| Glucose                       | 4.65 ± 0.18      | 0.31 ± 0.17               | 4.32 ± 0.31  | 0.44 ± 0.19  | 0.043     | 0.456                        |
| Glutamine                     | 5.29 ± 0.29      | -0.26 ± 0.24              | 4.61 ± 0.22  | 0.95 ± 0.22  | 0.220     | <.0001                       |
| Glutamate                     | 0.79 ± 0.04      | 0.09 ± 0.06               | 0.79 ± 0.04  | 0.06 ± 0.06  | -0.043    | 0.631                        |
| Glutaric acid monomethylester | 0.83 ± 0.04      | 0.07 ± 0.05               | 0.74 ± 0.04  | 0.13 ± 0.06  | 0.001     | 0.372                        |

Table S4 (Continued)

| Variables (M)          | Placebo (n = 24) |                           | KBR (n = 21) |              | $\beta^3$ | q-value <sup>4</sup> |
|------------------------|------------------|---------------------------|--------------|--------------|-----------|----------------------|
|                        | Baseline         | Delta change <sup>2</sup> | Baseline     | Delta change |           |                      |
| Glycerol               | 3.21 ± 0.1       | 0.48 ± 0.18               | 3.22 ± 0.18  | 0.42 ± 0.2   | 0.014     | 0.816                |
| Glycine                | 10.51 ± 1.29     | -0.83 ± 0.81              | 8.63 ± 0.75  | 1.18 ± 0.56  | 0.200     | 0.021                |
| Guanidoacetate         | 6.22 ± 0.4       | 0.52 ± 0.29               | 5.83 ± 0.51  | 0.03 ± 0.56  | -0.044    | 0.548                |
| Hippurate              | 14.49 ± 1.57     | -3.37 ± 1.92              | 16.55 ± 1.89 | 0.07 ± 2.16  | 0.034     | 0.157                |
| Histidine              | 4.33 ± 0.4       | -0.55 ± 0.4               | 3.76 ± 0.34  | 1.25 ± 0.38  | 0.018     | 0.013                |
| Isobutyrate            | 0.49 ± 0.03      | 0.04 ± 0.03               | 0.49 ± 0.04  | 0.06 ± 0.02  | 0.071     | 0.284                |
| Isoleucine             | 0.26 ± 0.01      | 0.01 ± 0.01               | 0.24 ± 0.01  | 0.04 ± 0.01  | 0.000     | 0.079                |
| Lactate                | 6.63 ± 1.93      | 0 ± 3.57                  | 4.13 ± 0.96  | -0.75 ± 0.97 | 0.190     | 0.310                |
| Leucine                | 0.45 ± 0.02      | 0.01 ± 0.02               | 0.42 ± 0.02  | 0.06 ± 0.02  | 0.000     | 0.084                |
| Phenylacetate          | 1.04 ± 0.04      | 0.01 ± 0.05               | 1.07 ± 0.06  | 0.21 ± 0.06  | 0.002     | 0.021                |
| Phenylalanine          | 1.03 ± 0.08      | 0.04 ± 0.11               | 1.13 ± 0.12  | 0.18 ± 0.12  | 0.001     | 0.480                |
| Pyridoxine             | 0.34 ± 0.02      | 0.05 ± 0.05               | 0.39 ± 0.03  | 0 ± 0.03     | -0.041    | 0.697                |
| Pyruvate               | 0.76 ± 0.08      | 0.05 ± 0.09               | 0.67 ± 0.06  | 0.03 ± 0.05  | -0.009    | 0.929                |
| Serine                 | 5.19 ± 0.31      | 0.42 ± 0.35               | 4.05 ± 0.18  | 1.51 ± 0.31  | 0.248     | 0.021                |
| Succinate              | 0.45 ± 0.05      | -0.02 ± 0.05              | 0.44 ± 0.03  | -0.01 ± 0.04 | 0.084     | 0.460                |
| Succinylacetone        | 0.81 ± 0.05      | 0.09 ± 0.06               | 0.74 ± 0.04  | 0.2 ± 0.06   | 0.001     | 0.171                |
| Taurine                | 10.46 ± 0.66     | 2.12 ± 1.18               | 10.05 ± 0.6  | 0.73 ± 0.96  | -0.101    | 0.395                |
| Trigonelline           | 0.96 ± 0.11      | 0.13 ± 0.1                | 1.06 ± 0.13  | 0.1 ± 0.12   | 0.098     | 0.451                |
| Trimethylamine         | 0.15 ± 0.01      | 0.02 ± 0.02               | 0.25 ± 0.04  | 0.13 ± 0.06  | 0.008     | 0.072                |
| Trimethylamine N-oxide | 6.4 ± 1.1        | 6.41 ± 3.78               | 7.2 ± 1.1    | 10.49 ± 5.56 | 0.290     | 0.245                |
| Tyrosine               | 1.5 ± 0.08       | 0.11 ± 0.06               | 1.48 ± 0.06  | 0.23 ± 0.05  | 0.001     | 0.134                |
| Uracil                 | 1.25 ± 0.06      | 0.09 ± 0.07               | 1.35 ± 0.09  | 0.15 ± 0.11  | 0.001     | 0.602                |
| Valine                 | 0.61 ± 0.14      | -0.12 ± 0.14              | 0.45 ± 0.02  | 0.05 ± 0.02  | 0.134     | 0.078                |
| Xylose                 | 1.16 ± 0.06      | 0.01 ± 0.09               | 1.43 ± 0.15  | -0.07 ± 0.2  | 0.068     | 0.562                |
| cis-Aconitate          | 2.67 ± 0.18      | -0.09 ± 0.21              | 2.48 ± 0.12  | 0.31 ± 0.12  | 0.004     | 0.098                |
| $\pi$ -Methylhistidine | 1.43 ± 0.22      | 0.73 ± 0.63               | 1.24 ± 0.17  | 0.26 ± 0.27  | -0.103    | 0.610                |

<sup>1</sup> Data are expressed as the means ± SEM. <sup>2</sup> The delta change was calculated by subtracting the measurement at baseline from that at the end of four weeks. <sup>3</sup> The beta estimates ( $\beta$ ; estimated slope) of each variable were determined using a linear mixed-effects model. <sup>4</sup> The q-values were calculated from P-values using Storey's false discovery rate approach.

**Table S5.** Summary of plasma <sup>1</sup>H NMR metabolites before and after placebo or KBR administration in sedentary overweight/obese adults challenged with exercise.<sup>1</sup>

| Variables (M)          | Placebo ( <i>n</i> = 24) |                           | KBR ( <i>n</i> = 21) |              | $\beta^3$ | <i>q</i> -value <sup>4</sup> |
|------------------------|--------------------------|---------------------------|----------------------|--------------|-----------|------------------------------|
|                        | Baseline                 | Delta change <sup>2</sup> | Baseline             | Delta change |           |                              |
| 3-Hydroxybutyrate      | 2.31 ± 0.18              | -0.29 ± 0.19              | 2.49 ± 0.22          | -0.04 ± 0.24 | 0.069     | 0.909                        |
| Acetate                | 1.1 ± 0.08               | -0.02 ± 0.09              | 1.2 ± 0.11           | 0.11 ± 0.12  | 0.084     | 0.909                        |
| Acetone                | 0.97 ± 0.07              | -0.09 ± 0.07              | 1.1 ± 0.11           | 0.04 ± 0.1   | 0.071     | 0.909                        |
| Alanine                | 10.85 ± 0.8              | -0.86 ± 0.76              | 13.3 ± 1.3           | -1.66 ± 1.33 | -0.074    | 0.909                        |
| Arginine               | 5.09 ± 0.34              | 0.13 ± 0.4                | 6.07 ± 0.54          | -0.05 ± 0.69 | -0.057    | 0.909                        |
| Betaine                | 2.42 ± 0.17              | 0.18 ± 0.21               | 2.97 ± 0.28          | -0.2 ± 0.33  | -0.120    | 0.909                        |
| Caffeine               | 0.45 ± 0.04              | 0.05 ± 0.04               | 0.52 ± 0.05          | -0.01 ± 0.06 | -0.160    | 0.909                        |
| Choline                | 1.57 ± 0.12              | 0.15 ± 0.12               | 1.72 ± 0.13          | 0.29 ± 0.22  | -0.032    | 0.913                        |
| Citrate                | 5.54 ± 0.38              | -0.49 ± 0.38              | 6.52 ± 0.59          | -0.92 ± 0.64 | -0.042    | 0.909                        |
| Creatine               | 1.16 ± 0.11              | 0.06 ± 0.09               | 1.47 ± 0.14          | -0.21 ± 0.13 | -0.157    | 0.909                        |
| Creatinine             | 0.86 ± 0.06              | -0.03 ± 0.07              | 0.85 ± 0.05          | 0.06 ± 0.06  | 0.036     | 0.909                        |
| Ethylene glycol        | 2.33 ± 0.17              | -0.24 ± 0.17              | 2.52 ± 0.22          | -0.21 ± 0.27 | 0.002     | 0.987                        |
| Formate                | 0.9 ± 0.07               | -0.04 ± 0.07              | 0.99 ± 0.08          | 0.02 ± 0.1   | 0.035     | 0.909                        |
| Glucose                | 118.56 ± 7.74            | -6.82 ± 8.12              | 140.51 ± 11.64       | -7.12 ± 12   | -0.003    | 0.978                        |
| Glutamine              | 14.55 ± 1.07             | -0.81 ± 0.98              | 17.18 ± 1.41         | -1.62 ± 1.62 | -0.071    | 0.909                        |
| Glycerol               | 7.57 ± 0.58              | -0.67 ± 0.58              | 8.76 ± 0.78          | -1.52 ± 0.84 | -0.140    | 0.909                        |
| Glycine                | 5.97 ± 0.43              | -0.41 ± 0.47              | 7.2 ± 0.64           | -0.82 ± 0.66 | -0.058    | 0.909                        |
| Histidine              | 2.36 ± 0.16              | -0.16 ± 0.17              | 2.73 ± 0.22          | -0.21 ± 0.24 | -0.017    | 0.955                        |
| Isoleucine             | 2.27 ± 0.15              | 0.02 ± 0.17               | 2.58 ± 0.23          | -0.12 ± 0.23 | -0.062    | 0.909                        |
| Lactate                | 38.4 ± 5.15              | -1.78 ± 5.07              | 43.6 ± 4.79          | -7.56 ± 3.81 | -0.195    | 0.909                        |
| Leucine                | 4.55 ± 0.3               | -0.07 ± 0.31              | 5.1 ± 0.4            | -0.16 ± 0.47 | -0.030    | 0.909                        |
| Lysine                 | 1.31 ± 0.1               | 0 ± 0.16                  | 1.72 ± 0.2           | -0.25 ± 0.25 | -0.134    | 0.909                        |
| Methanol               | 2.18 ± 0.13              | 0.11 ± 0.17               | 2.37 ± 0.22          | 0.35 ± 0.25  | 0.131     | 0.909                        |
| N-Nitrosodimethylamine | 3.04 ± 0.22              | -0.03 ± 0.22              | 3.56 ± 0.32          | -0.21 ± 0.38 | -0.062    | 0.909                        |
| Phenylalanine          | 1.13 ± 0.08              | -0.11 ± 0.08              | 1.35 ± 0.1           | -0.15 ± 0.11 | -0.044    | 0.909                        |
| Pyruvate               | 1 ± 0.11                 | 0.11 ± 0.13               | 1.2 ± 0.13           | 0.08 ± 0.14  | -0.109    | 0.909                        |
| Serine                 | 5.14 ± 0.37              | -0.1 ± 0.38               | 5.98 ± 0.54          | -0.08 ± 0.66 | -0.010    | 0.975                        |
| Succinate              | 0.38 ± 0.03              | -0.01 ± 0.03              | 0.45 ± 0.04          | -0.05 ± 0.04 | -0.101    | 0.909                        |
| Threonine              | 5.98 ± 0.33              | 0.11 ± 0.43               | 7.59 ± 0.72          | -0.09 ± 0.81 | 0.036     | 0.909                        |
| Tyrosine               | 1.69 ± 0.11              | -0.03 ± 0.12              | 2.08 ± 0.16          | -0.26 ± 0.17 | -0.117    | 0.909                        |
| Valine                 | 7.3 ± 0.48               | 0.1 ± 0.53                | 8.54 ± 0.7           | -0.63 ± 0.71 | -0.089    | 0.909                        |

<sup>1</sup> Data are expressed as the means ± SEM. <sup>2</sup> The delta change was calculated by subtracting the measurement at baseline from that at the end of four weeks. <sup>3</sup> The beta estimates ( $\beta$ ; estimated slope) of each variable were determined using a linear mixed-effects model. <sup>4</sup> The *q*-values were calculated from *p*-values using Storey's false discovery rate approach.

**Supplementary Materials:** The following are available online at <http://www.mdpi.com/2072-6643/9/3/233/s1>, Figure S1: The Consolidated Standards of Reporting Trials flow diagram representing the phases of the randomized study for comparing the two species of raspberries, Table S1: Baseline characteristics of subjects participated in a preliminary study, Table S2: Daily dietary energy and nutrient intake at baseline and Week 4, Table S3: Comparison of anti-oxidant and anti-inflammatory effects of KBR and NAB in sedentary overweight/obese adults challenged with exercise, Table S4: Summary of urinary  $^1\text{H}$  NMR metabolites before and after placebo or KBR administration in sedentary overweight/obese adults challenged with exercise, Table S5: Summary of plasma  $^1\text{H}$  NMR metabolites before and after placebo or KBR administration in sedentary overweight/obese adults challenged with exercise, Table S6: Associations between the changes in traditional biomarkers and urinary metabolomic signatures at baseline.



**Table S6.** Associations between the changes in traditional biochemical markers and urinary metabolomic signatures at baseline.<sup>1</sup>

| Variables              | GSSG    |         |         | GSH:GSSG ratio |         |         | MDA     |         |         | IL-6    |         |         |
|------------------------|---------|---------|---------|----------------|---------|---------|---------|---------|---------|---------|---------|---------|
|                        | $\beta$ | t-value | p-value | $\beta$        | t-value | p-value | $\beta$ | t-value | p-value | $\beta$ | t-value | p-value |
| 3-Indoxylsulfate       | -0.092  | 0.18    | 0.861   | 0.575          | 0.96    | 0.343   | 0       | 0       | 1.000   | 0.257   | 0.37    | 0.713   |
| Adenine                | 0.397   | -0.81   | 0.425   | -0.876         | -1.55   | 0.128   | 1.172   | -2.47   | 0.018   | 0.314   | 0.48    | 0.633   |
| Alanine                | 0.127   | -0.26   | 0.799   | -0.139         | -0.25   | 0.805   | 0.652   | -1.43   | 0.159   | 0.993   | 1.49    | 0.145   |
| Asparagine             | 0.748   | -1.52   | 0.136   | -0.363         | -0.65   | 0.520   | 0.652   | -1.43   | 0.159   | -0.464  | -0.71   | 0.482   |
| Betaine                | 0.396   | -0.8    | 0.426   | 0.897          | 1.59    | 0.119   | -0.277  | 0.62    | 0.540   | -0.181  | -0.28   | 0.784   |
| Carnitine              | 0.193   | -0.39   | 0.697   | 0.233          | 0.42    | 0.679   | 0.326   | -0.72   | 0.473   | 0.792   | 1.21    | 0.234   |
| Citrate                | 0.529   | -1.06   | 0.295   | 0.763          | 1.36    | 0.181   | 0.149   | -0.33   | 0.744   | 0.636   | 0.99    | 0.326   |
| Formate                | 0.259   | -0.52   | 0.605   | 0.617          | 1.09    | 0.280   | 0.005   | -0.01   | 0.991   | 0.857   | 1.31    | 0.198   |
| Glutamine              | 0.193   | -0.39   | 0.697   | 0.233          | 0.42    | 0.679   | 0.530   | -1.17   | 0.249   | 0.314   | 0.48    | 0.633   |
| Glycine                | 0.394   | -0.8    | 0.428   | 1.638          | 2.81    | 0.008   | -0.277  | 0.62    | 0.540   | -0.164  | -0.25   | 0.803   |
| Histidine              | 0.820   | -1.66   | 0.105   | 0.246          | 0.44    | 0.664   | 0.124   | -0.28   | 0.783   | -0.387  | -0.59   | 0.557   |
| Lysine                 | 0.391   | -0.8    | 0.431   | 0.029          | 0.05    | 0.959   | 0.124   | -0.28   | 0.783   | 1.295   | 1.95    | 0.057   |
| N-Phenylacetyl glycine | -0.157  | 0.32    | 0.754   | 1.820          | 3.08    | 0.004   | -0.198  | 0.44    | 0.663   | -0.599  | -0.9    | 0.374   |
| N6-Acetyllysine        | -0.423  | 0.86    | 0.397   | 0.681          | 1.21    | 0.233   | 0.124   | -0.28   | 0.783   | -0.665  | -1.01   | 0.319   |
| Phenylacetate          | 0.053   | -0.11   | 0.916   | 0.846          | 1.47    | 0.149   | 0.166   | -0.37   | 0.716   | -0.101  | -0.15   | 0.879   |
| Serine                 | 0.131   | -0.27   | 0.792   | -0.351         | -0.63   | 0.534   | 0.447   | -0.99   | 0.328   | 0.240   | 0.37    | 0.716   |
| Trimethylamine         | 0.867   | -1.72   | 0.093   | 0.229          | 0.4     | 0.693   | -0.127  | 0.27    | 0.785   | -0.156  | -0.23   | 0.817   |

<sup>1</sup> Analyses using a generalized linear mixed model with a logit link function (entry method) using the alterations of clinical biomarkers from blood as the dependent variable and baseline urinary <sup>1</sup>H NMR metabolomics data as the main predictor. The beta estimates ( $\beta$ ) and the corresponding t-statistics (t-value) represent the magnitude of effect size (logit scale) and the test for significance for the respective independent variable. The exercise challenge was entered into the model as the confounding variable. Subjects with lower baseline metabolite values were the reference category.
